# Supplementary material for: Sensing activity of cholinesterases through a luminescence response of the hexarhenium cluster complex [{Re6S8}(OH)6]4−
Source: Royal Society of Chemistry journal article supplement (doi:10.1039/c6an00581k), 2016-01-01
Supplement: c6an00581k1.pdf [file c6an00581k1.pdf]

## Supporting Information

### Sensing Activity of Cholinesterases through Luminescence Response of Hexarhenium Cluster Complex $[\{\text{Re}_6\text{S}_8\}(\text{OH})_6]^{4-}$

Julia G. Elistratova,<sup>a</sup> Asiya R. Mustafina,<sup>\*,a</sup> Konstantin A. Brylev,<sup>b</sup> Konstantin A. Petrov,<sup>a</sup> Michael A. Shestopalov,<sup>b</sup> Yuri V. Mironov,<sup>b</sup> Vasily M. Babaev,<sup>a</sup> Ildar K. Rizvanov,<sup>a</sup> Patrick Masson,<sup>c</sup> Oleg G. Sinyashin<sup>a</sup>

<sup>a</sup>A. E. Arbuzov Institute of Organic and Physical Chemistry, Kazan Scientific Center, Russian Academy of Sciences, 8 Arbuzov str., 420088, Kazan, Russian Federation

<sup>b</sup>Nikolaev Institute of Inorganic Chemistry SB RAS, 3 Acad. Lavrentiev Ave., 630090 Novosibirsk, Russian Federation

<sup>c</sup>Kazan Federal University, 18 Kremlyovskaya str., 420008 Kazan, Russian Federation

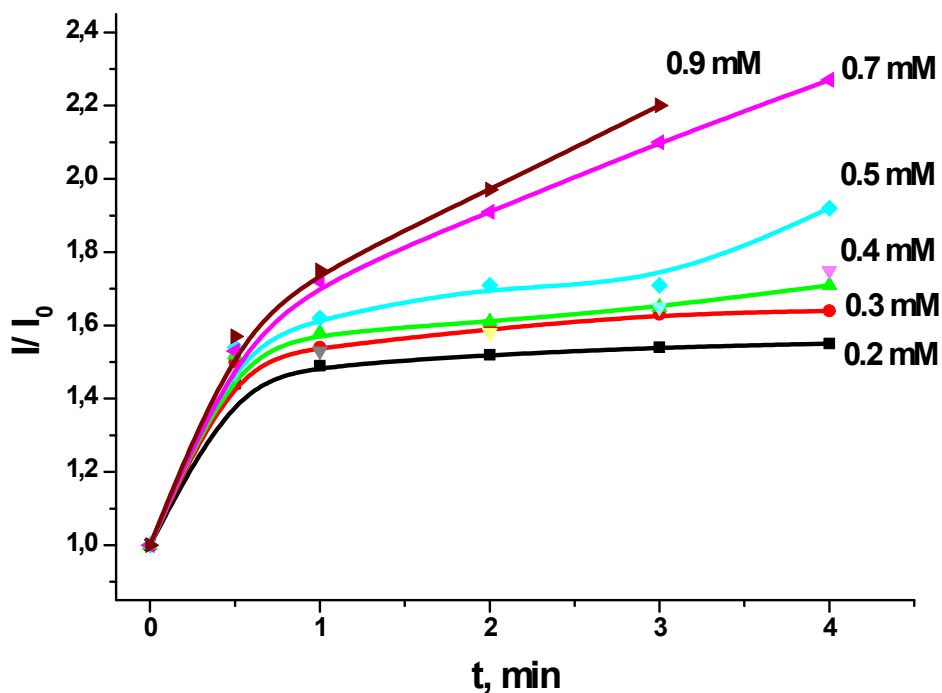

**Figure S-1.**  $I/I_0$  versus time for the cluster complex solution (0.0075 mM),  $2 \cdot 10^{-8}$  M BuChE and different concentrations of Ach, which are designated in the Figure.

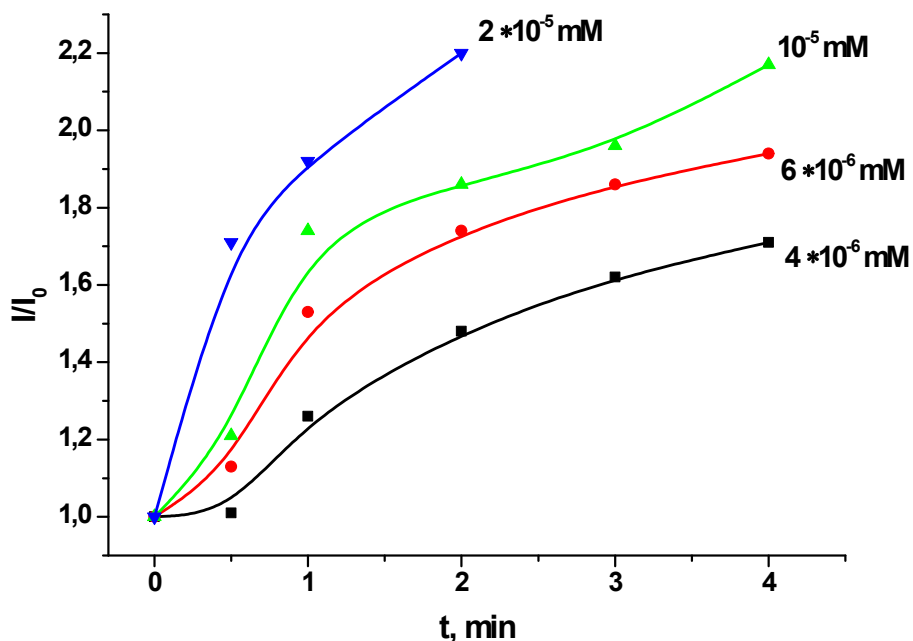

**Figure S-2.**  $I/I_0$  versus time for the cluster complex solution (0.0075 mM), 0.4 mM ACh, 1 mM NaCl and different concentrations of AChE, which are designated in the Figure.

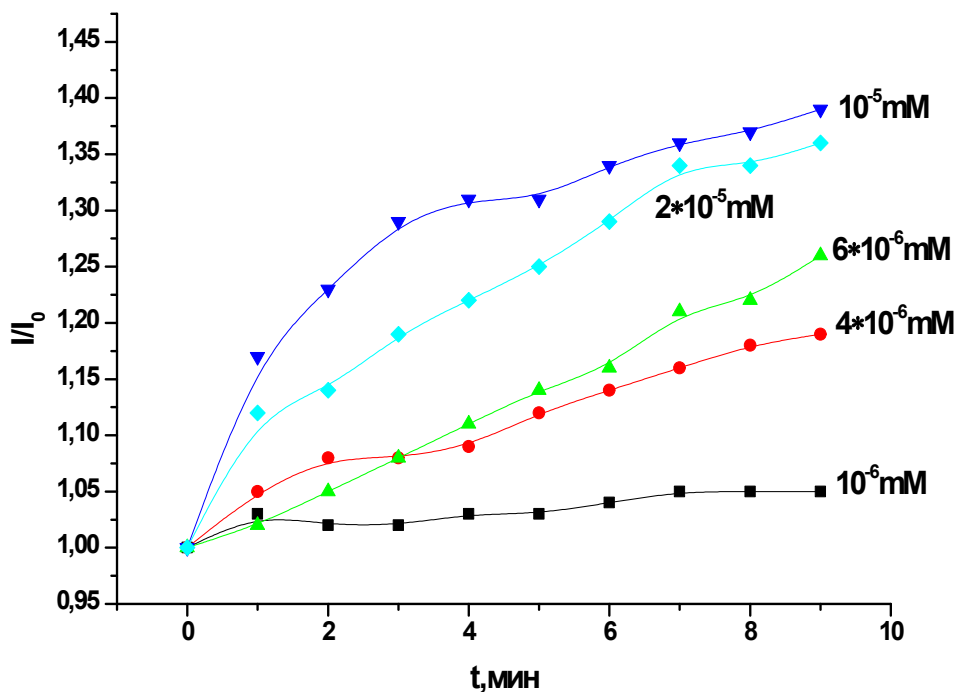

**Figure-3.**  $I/I_0$  versus time for the cluster complex solution (0.0075 mM), 0. mM ACh, 1 mM NaCl and different concentrations of AChE, which are designated in the Figure.
